# Supplementary material
Source: PubMed Central journal article supplement (PMC412875)
Supplement: plntcell_tpc.019059_1.pdf [file plntcell_tpc.019059_1.pdf]

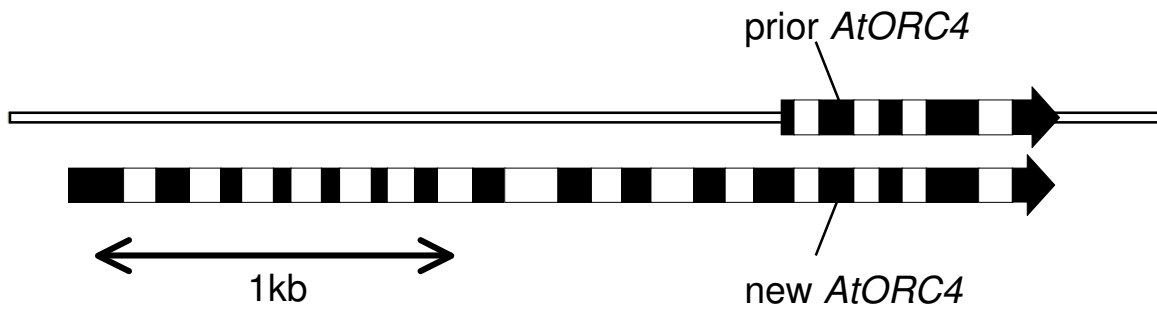

**Supplemental Figure 1. Gene diagram of *AtORC4*.**

The region of chromosome 2 comprising *AtORC4* showing the prior annotated mRNA (At2g01120) and the new mRNA (accession AJ586913).
